# Supplementary material for: Mutations in SOX17 are Associated with Congenital Anomalies of the Kidney and the Urinary Tract
Source: PubMed Central journal article supplement (PMC3056145; doi:10.1002/humu.21378), 2010-10-19
Supplement: humu0031-1352-SD1.pdf [file humu0031-1352-SD1.pdf]

Alignment :

|          |                                                                 |     |
|----------|-----------------------------------------------------------------|-----|
| Dr-Sox17 | MSSPDAGYSSDDPSQTSSCSSVMMPGMGQCPWVDPLSPLSDSKSKHEKCSAAGP-----G    | 55  |
| Hs-SOX17 | MSSPDAGYASDDQSQTSALPAVMAGLGPCPWAESLSPIGDMKVKGAPANS GAPAGAAG     | 60  |
| Mm-Sox17 | MSSPDAGYASDDQSQPRSAQPAVMAGLGPCPWAESLSPLGDVKVKGEVVASSGAPAGTSG    | 60  |
| Dr-Sox17 | RGKSEPRIRRP MNAFMVWAKDERKRLAQONPDLHNAELSKMLGKSWKALPMVDKRPFVVEE  | 115 |
| Hs-SOX17 | RAKGE SRIRRP MNAFMVWAKDERKRLAQONPDLHNAELSKMLGKSWKALTLAEKRPFVVEE | 120 |
| Mm-Sox17 | RAKAE SRIRRP MNAFMVWAKDERKRLAQONPDLHNAELSKMLGKSWKALTLAEKRPFVVEE | 120 |
| Dr-Sox17 | AERLRVKHMQDHPNFKYRPRRRKQVQRNKRLEPSFPLPGMCDAKM-TLCTEGMSAGYSGA    | 174 |
| Hs-SOX17 | AERLRVQHMQDHPNFKYRPRRRKQVQRNKRLEGGF-LHGLAEPQAAALGPEGGRVAMDGL    | 179 |
| Mm-Sox17 | AERLRVQHMQDHPNFKYRPRRRKQVQRNKRLEGGF-LHALVEPQAGALGPEGGRVAMDGL    | 179 |
| Dr-Sox17 | GLPQYCENHTLFESYSLPTDPSMDAGTTEFFAQLQDQSAFSYHHQOEHHFQEQTNILN      | 234 |
| Hs-SOX17 | GLQFPEQGFAGPPLLPPHMGGHYRDCQSLGAPPLDGYPLPTPDTSPLDGVDPDPAFFAA     | 239 |
| Mm-Sox17 | GLPFPEPGYPAGPPLMSPHMGPHYRDCQGLGAPALDGYPLPTPDTSPLDGVEQDPAFFAA    | 239 |
| Dr-Sox17 | DTHCHGNTQTLKSRQSHSIAYSNINTNTNSNLHAPINAQLSSINLQQVFHENANPQISHH    | 294 |
| Hs-SOX17 | PMPGDCPAAGTYSYAQVSDIAGPEPPAGPMHPRLGPEPAGPSIPGLLAPPSALHLYYGA     | 299 |
| Mm-Sox17 | PLPGDCPAAGTYTYAPVSDYAVSVIEPPAGPM--RVGPDPSGPAMPGILAPPSALHLYYGA   | 297 |
| Dr-Sox17 | PGTHLNIFNRSPSSSSHAMTFA---YLNCPSTLDTFYNSSSQMKELSHCVSSHTHKQQS     | 351 |
| Hs-SOX17 | MGSPGAGGGRGFQMPQHQQHQ-----HQHHP-GPGQSPPEALPCRDGTDPSQPA          | 352 |
| Mm-Sox17 | MGSPAASAGRGFHAQQQPLQPQAPPPPPQQQHPAHGPGQSPPEALPCRDGTESNQPT       | 357 |
| Dr-Sox17 | IAEAQSQASTATHSSGMVDEVEFEHCLSFVGSAPLPGSDLISTVLSDASSAVYICGYN      | 411 |
| Hs-SOX17 | ELLGEVDRTEFEQYLHFVCKPEMGLPYQGHDSGVNLPDSHGAISSVSDASSAVYICNYP     | 412 |
| Mm-Sox17 | ELLGEVDRTEFEQYLPFVYKPEMGLPYQGHDCGVNLSDSHGAISSVSDASSAVYICNYP     | 417 |
| Dr-Sox17 | NS                                                              | 413 |
| Hs-SOX17 | DV                                                              | 414 |
| Mm-Sox17 | DI                                                              | 419 |

**Supp. Figure S1.** Alignment of vertebrate Sox17 protein sequences. Residues identical in all species are highlighted in yellow, those conserved only in two species are highlighted in blue. Tyrosine residues (Y) predicted to undergo phosphorylation are highlighted in red. The HMG box is indicated by a black line, the G/P-rich region by a red line. Red arrows indicated the location of the mutations. The Accession numbers for the sequences are as follows: Dr-Sox17 (NP\_571362), Hs-SOX17 (NP\_071899), Mm Sox17 (NP\_035571). Dr: *Danio rerio*, Hs: *Homo sapiens*, Mm: *Mus musculus*.

**Supp. Table S1. Molecular characterization of the duplicated chromosome 8q region in Family 1**

| Marker       | Position (Kb) | Proband  | Mother  | Father  | der(8) | chr. 8 | Results |
|--------------|---------------|----------|---------|---------|--------|--------|---------|
| D8S1750      | 35470         | 216/220  | 216/218 | 216/220 | ND     | ND     | N       |
| D8S1821      | 38369         | 146/164  | 140/164 | 146     | ND     | ND     | N       |
| D8S268       | 41264         | 255/257  | 257     | 255/257 | ND     | ND     | N       |
| D8S1115      | 42544         | 164      | 161/164 | 161/164 | ND     | ND     | U       |
| Centromere   |               |          |         |         |        |        |         |
| D8S531       | 49074         | 117*/119 | 115/117 | 115/119 | 117    | 119    | dup(M)  |
| D8S601       | 53846         | 219/227* | 223/227 | 219/231 | 227    | 219    | dup(M)  |
| D8S1737      | 54949         | 191      | 191     | 191     | 191    | 191    | U       |
| SOX17 E2 T/A | 55534         | T/A*     | T/A     | T       | A      | T      | dup(M)  |
| D8S509       | 55756         | 269*/271 | 269     | 271     | 269    | 271    | dup(M)  |
| D8S1828      | 56962         | 205      | 205     | 205     | 205    | 205    | U       |
| D8S260       | 60000         | 208/210  | 210     | 208     | 210    | 208    | N       |

The proband, her mother and father, and two somatic cell hybrid clones containing either the duplicated chromosome 8 (der(8)) or the normal chromosome 8 (chr. 8), were assayed. Duplicated alleles are indicated by an asterisk (\*). N, normal chromosomal asset; U, uninformative; dup(M), duplication of maternal origin; ND, not done.
